# Supplementary material
Source: HighWire-hosted journal article supplement (https://ijgc.bmj.com/highwire/filestream/29755/field_highwire_adjunct_files/0/ijgc-2023-004486supp001_data_supplement.pdf)
Supplement: ijgc-2023-004486supp001_data_supplement.pdf [file ijgc-2023-004486supp001_data_supplement.pdf]

## APPENDIX 1. IDENTIFICATION OF SCIENTIFIC EVIDENCE

### Literature search in MEDLINE

|                 |                                                                                                                                                                                                                                                                                                                                                                                                                                                                                                                                                                                                                                                                                                                                                                                                                                                                                                                                                                                                                                                                                                                                                                                                                                                                                                                                                                                                                                                                                                                                                                                                                                                                                                                                                                                                                                                                                                                                                                                                                                                                                                                                                                                                                                                                                                                                                                                                                                                                                                                                                                                                                                                                                                                                                                                                                                                                                                                                                                                                                                                                                                                                                                                                                                                                                                                                                                                                                                                                                                                                                                                                                                                                                                                                                                                                                                                                                                        |
|-----------------|--------------------------------------------------------------------------------------------------------------------------------------------------------------------------------------------------------------------------------------------------------------------------------------------------------------------------------------------------------------------------------------------------------------------------------------------------------------------------------------------------------------------------------------------------------------------------------------------------------------------------------------------------------------------------------------------------------------------------------------------------------------------------------------------------------------------------------------------------------------------------------------------------------------------------------------------------------------------------------------------------------------------------------------------------------------------------------------------------------------------------------------------------------------------------------------------------------------------------------------------------------------------------------------------------------------------------------------------------------------------------------------------------------------------------------------------------------------------------------------------------------------------------------------------------------------------------------------------------------------------------------------------------------------------------------------------------------------------------------------------------------------------------------------------------------------------------------------------------------------------------------------------------------------------------------------------------------------------------------------------------------------------------------------------------------------------------------------------------------------------------------------------------------------------------------------------------------------------------------------------------------------------------------------------------------------------------------------------------------------------------------------------------------------------------------------------------------------------------------------------------------------------------------------------------------------------------------------------------------------------------------------------------------------------------------------------------------------------------------------------------------------------------------------------------------------------------------------------------------------------------------------------------------------------------------------------------------------------------------------------------------------------------------------------------------------------------------------------------------------------------------------------------------------------------------------------------------------------------------------------------------------------------------------------------------------------------------------------------------------------------------------------------------------------------------------------------------------------------------------------------------------------------------------------------------------------------------------------------------------------------------------------------------------------------------------------------------------------------------------------------------------------------------------------------------------------------------------------------------------------------------------------------------|
| Research period | 2015/09/01 - 2022/04/14                                                                                                                                                                                                                                                                                                                                                                                                                                                                                                                                                                                                                                                                                                                                                                                                                                                                                                                                                                                                                                                                                                                                                                                                                                                                                                                                                                                                                                                                                                                                                                                                                                                                                                                                                                                                                                                                                                                                                                                                                                                                                                                                                                                                                                                                                                                                                                                                                                                                                                                                                                                                                                                                                                                                                                                                                                                                                                                                                                                                                                                                                                                                                                                                                                                                                                                                                                                                                                                                                                                                                                                                                                                                                                                                                                                                                                                                                |
| Indexing terms  | accuracy, adjuvant treatment, adjuvant therapy, adverse effects, bevacizumab, bilateral en bloc dissection, biopsy, brachytherapy, brachytherapy boost, carboplatin, carcinoma, chemotherapy (primary, neoadjuvant, adjuvant, definitive, palliative), chemoradiation (primary, neoadjuvant, adjuvant, definitive, palliative), chemoradiotherapy (primary, neoadjuvant, adjuvant, definitive, palliative), chemotherapeutic agents, clear margin, combination, combined treatment, computed tomography, cytologic assessment, cytologic evaluation, cytology, detection, detection rate, diagnosis, electrochemotherapy, en bloc dissection, excision biopsy, excision, exenteration (anterior, posterior, total), FIGO, FIGO staging, FIGO staging system, follow-up, frozen sections, groin lymph node involvement, groin node metastasis, histology, histological examination, imaging, immunohistochemistry, incision biopsy, inguinofoveal lymph node dissection, initial diagnosis, intraoperative assessment, intraoperative evaluation, isolated removal, laboratory testing, local excision, lymph node dissection, lymphadenectomy, (inguinofoveal or deep, inguinal or superficial, ipsilateral, pelvic), lymphoscintigram, lymphoscintigraphy, lymphovascular invasion, lymphovascular space involvement, margin, multidisciplinary gynaecological oncology team, multidisciplinary team, multidisciplinary tumour board, multidisciplinary setting, node dissection, operation, paclitaxel, palliation, palliative care, palliative setting, palliative surgery, patient related outcome, pathological assessment, pathological evaluation, pathology, pathology report, pelvic-lymph node dissection, pembrolizumab, perioperative care, physical examination, positron emission tomography, positron emission tomography-computed tomography, postoperative complications, preoperative biopsy, preoperative care, preoperative investigation, preoperative staging, preoperative workup, punch biopsy, quality of life, radiation (primary, neoadjuvant, adjuvant, definitive, palliative), radiation therapy (primary, neoadjuvant, adjuvant, definitive, palliative), radiation treatment (primary, neoadjuvant, adjuvant, definitive, palliative), radical local excision, radiotherapy (primary, neoadjuvant, adjuvant, definitive, palliative), reconstructive surgery, recurrence, recurrent disease, recurrent vulvar cancer, recurrent vulvar carcinoma, referral, referred vulvar cancer, referred vulvar carcinoma, relapse, salvage, salvage surgery, salvage therapy, screening, sensitivity, sentinel lymph node, sentinel lymph node assessment, sentinel lymph node biopsy, sentinel lymph node dissection, sentinel lymph node procedure, sentinel node, specificity, staging, staging classification, staging system, supportive care, supportive setting, surgery, surgical management, surgical excision, surgical margin, surgical outcome, surgical procedures, surgical resection, surgical treatment, surveillance, survival rate, survival analysis, survivorship, systemic treatment, targeted therapeutic approaches, targeted therapeutics, targeted therapy, TNM, TNM classification, toxicity, treatment planning, treatment outcome, tumour classification system, tumour-free margin, tumour margin, ultrasound, ultrastaging, vulvar cancer (early and/or advanced stages), vulvar malignancy (early and/or advanced stages), vulvar neoplasms (early and/or advanced stages), vulvar, vulvar cancer (early and/or advanced stages), vulvar carcinoma (early and/or advanced stages), vulvar malignancy (early and/or advanced stages), vulvar neoplasm (early and/or advanced stages), vulvar squamous cancer (early and/or advanced stages), vulvar squamous carcinoma (early and/or advanced stages), vulvectomy (radical, simple, modified, hemi) |
| Language        | English                                                                                                                                                                                                                                                                                                                                                                                                                                                                                                                                                                                                                                                                                                                                                                                                                                                                                                                                                                                                                                                                                                                                                                                                                                                                                                                                                                                                                                                                                                                                                                                                                                                                                                                                                                                                                                                                                                                                                                                                                                                                                                                                                                                                                                                                                                                                                                                                                                                                                                                                                                                                                                                                                                                                                                                                                                                                                                                                                                                                                                                                                                                                                                                                                                                                                                                                                                                                                                                                                                                                                                                                                                                                                                                                                                                                                                                                                                |
| Study design    | Priority was given to high-quality systematic reviews and meta-analyses but lower levels of evidence were also evaluated. The search strategy excluded editorials, letters, case reports and <i>in vitro</i> studies                                                                                                                                                                                                                                                                                                                                                                                                                                                                                                                                                                                                                                                                                                                                                                                                                                                                                                                                                                                                                                                                                                                                                                                                                                                                                                                                                                                                                                                                                                                                                                                                                                                                                                                                                                                                                                                                                                                                                                                                                                                                                                                                                                                                                                                                                                                                                                                                                                                                                                                                                                                                                                                                                                                                                                                                                                                                                                                                                                                                                                                                                                                                                                                                                                                                                                                                                                                                                                                                                                                                                                                                                                                                                   |

## APPENDIX 2. LIST OF THE 206 EXTERNAL REVIEWERS

**Reem Abdallah**, gynaecology oncologist (Lebanon); **Domenico Albano**, nuclear medicine physician (Italy); **Hoda Al-Booz**, clinical oncologist (United Kingdom); **Silvia Allende**, palliative care physician (Mexico); **Diogo Alpuim Costa**, medical oncologist (Portugal); **Roberto Altamirano**, gynaecology oncologist (Chile); **Eder Arango**, gynaecology oncologist (Mexico); **Beyhan Ataseven**, gynaecology oncologist (Germany); **Giacomo Avesani**, radiologist (Italy); **Glauco Baiocchi**, gynaecology oncologist (Brazil); **Manel Barahona Orpinell**, gynaecology oncologist (Spain); **Jana Barinoff**, gynaecology oncologist (Germany); **Ellen Barlow**, gynaecology oncologist (Australia); **Anne-Sophie Bats**, gynaecology oncologist (France); **Guani Benedetta**, gynaecology oncologist (Switzerland); **Virginia Benito Reyes**, gynaecology oncologist (Spain); **Sushil Beriwal**, radiation oncologist (United States of America); **Margarida Bernardino**, gynaecology oncologist (Portugal); **Claudia Bessa Pereira Chaves**, gynaecology oncologist (Brazil); **Nicolo Bizzarri**, gynaecology oncologist (Italy); **Line Bjørge**, obstetrician gynaecologist (Norway); **Pawel Blecharz**, gynaecology oncologist (Poland); **Maaïke Bleeker**, pathologist (Netherlands); **Jiri Bouda**, gynaecology oncologist (Czech Republic); **Vance Broach**, gynaecology oncologist (United States of America); **Ewa Burchardt**, radiation oncologist (Poland); **Silvia Cabrera Díaz**, gynaecology oncologist (Spain); **Xavier Carcopino**, obstetrician gynaecologist (France); **Marta Caretto**, gynaecologist (Italy); **Heloisa de Andrade Carvalho**, radiation oncologist (Brazil); **Supriya Chopra**, radiation oncologist (India); **Mohammad Ali Asgar Chowdhury**, clinical oncologist (Bangladesh); **Angela Collarino**, nuclear medicine physician (Italy); **Ilaria Colombo**, medical oncologist (Switzerland); **Cihan Comba**, gynaecology oncologist (Turkey); **Sofia Córdoba**, radiation oncologist (Spain); **Pluvio J Coronado**, gynaecology oncologist (Spain); **Lúcia Correia**, gynaecologist (Portugal); **Ovidiu Florin Coza**, radiation oncologist (Romania); **Caetano Da Silva Cardial**, gynaecology oncologist (Brazil); **Timoleon Dagres**, gynaecology oncologist (Germany); **Joanne de Hullu**, obstetrician gynaecologist (Netherlands); **Clelia Teresa DelleCurti**, radiation oncologist (Italy); **Anne de Middelaer**, patient (Belgium); **Begoña Diaz de la Noval**, gynaecology oncologist (Spain); **Antonio Ditto**, gynaecology oncologist (Italy); **Jelena Dotlic**, obstetrician gynaecologist (Serbia); **Georgina Dominguez**, palliative care physician (Mexico); **Sally Eltawab**, gynaecology oncologist (United Kingdom); **Sophie Espenel**, radiation oncologist (France); **Farah Farzaneh**, gynaecology oncologist (Iran); **Ana Felix**, pathologist (Portugal); **Federico Ferrari**, obstetrician gynaecologist (Italy); **Angelica Viviana Fletcher Prieto**, gynaecology oncologist (Colombia); **Simona Maria Fragomeni**, gynaecology oncologist (Italy); **Ligita Frøding**, gynaecology oncologist (Denmark); **Cristina Frutuoso**, gynaecologist (Portugal); **Angiolo Gadducci**, obstetrician gynaecologist (Italy); **Niccolò Gallio**, gynaecology oncologist (Italy); **Ramiro Garcia Ortiz**, medical oncologist (Mexico); **Simone Garzon**, gynaecologist (Italy); **Prafull Ghatage**, gynaecology oncologist (Canada); **Andrea Giannini**, gynaecologist (Italy); **Lilian Gien**, gynaecology oncologist (Canada); **Antonio Gil-Moreno**, gynaecology oncologist (Spain); **Eva Maria Gomez-Garcia**, medical oncologist (Mexico); **Dan Grisar**, gynaecology oncologist (Israel); **Benedetta Gui**, radiologist (Italy); **Murat Gultekin**, gynaecology oncologist (Turkey); **Lavanya Gurram**, radiation oncologist (India); **Cristina Gutiérrez Miguélez**, radiation oncologist (Spain); **Frédéric Guyon**, gynaecology oncologist (France); **Neville Hacker**, gynaecology oncologist (Australia); **Kathy Han**, radiation oncologist Canada; **Annette Hasenburg**, gynaecology oncologist (Germany); **Kristina Hellman**, medical oncologist (Sweden); **Reda Hemida**, gynaecology oncologist (Egypt); **Gines Hernandez-Cortes**, obstetrician gynaecologist (Spain); **Antonio Herreros**, medical physicist (Spain); **Cathrine Holland**, gynaecology oncologist (United Kingdom); **Brigitte Honhon**, medical oncologist (France); **Zachary Horne**, radiation oncologist (United States of America); **Peter Hoskin**, clinical oncologist (United Kingdom); **Sara Iacoponi**, gynaecology oncologist (Spain); **Jaunarenalbon**, gynaecology oncologist (Spain); **David Isla**, gynaecology oncologist (Mexico); **Marcin Jedryka**, gynaecology oncologist (Poland); **Elmar Joura**, gynaecology oncologist (Austria); **Ioannis Kalogiannidis**, gynaecology oncologist (Greece); **Sean Kehoe**, gynaecology oncologist (United Kingdom); **Vesna Kesic**, gynaecology oncologist (Serbia); **Pearly Khaw**, radiation oncologist (Australia); **Gurkan Kiran**, gynaecology oncologist (Turkey); **Pawel Knapp**, gynaecology oncologist (Poland); **Roman Kocián**, gynaecology oncologist (Czech

Republic); **Meriem Koual**, gynaecology oncologist (France); **Concetta Laliscia**, radiation oncologist (Italy); **Valentina Lancellotta**, radiation oncologist (Italy); **Fabio Landoni**, gynaecologist (Italy); **Coriolan Lebreton**, medical oncologist (France); **Jacob Lindegaard**, radiation oncologist (Denmark); **Michals Liontos**, medical oncologist (Greece); **Domenica Lorusso**, gynaecology oncologist (Italy); **José Claudio Maañón**, obstetrician gynaecologist (Spain); **Gabriella Macchia**, radiation oncologist (Italy); **Tiziano Maggino**, gynaecology oncologist (Italy); **Aljosa Mandic**, gynaecology oncologist (Serbia); **Simone Marnitz**, radiation oncologist (Germany); **Fabio Martinelli**, gynaecology oncologist (Italy); **Ladislav Masak**, gynaecology oncologist (Slovakia); **Claudia Mateoiu**, pathologist (Sweden); **Patrice Mathevet**, gynaecology oncologist (Switzerland); **Xavier Matias-Guiu**, pathologist (Spain); **Koji Matsuo**, gynaecology oncologist (United States of America); **Jessica McAlpine**, gynaecology oncologist (Canada); **Lucas Mendez**, radiation oncologist (Canada); **Leonardo Micheletti**, gynaecologist (Italy); **Lucas Minig**, gynaecology oncologist (Spain); **Miloš Mlynček**, gynaecology oncologist (Slovakia); **David Alejandro Morales Fernandez**, gynaecology oncologist (Colombia); **Jo Morrison**, gynaecology oncologist (United Kingdom); **Michel Mueller**, gynaecology oncologist (Switzerland); **Eva Myriokefalitaki**, gynaecology oncologist (United Kingdom); **Raj Naik**, gynaecology oncologist (United Kingdom); **Dina Najjari Jamal**, radiation oncologist (Spain); **Fabrice Narducci**, gynaecology oncologist (France); **Krzysztof Nowosielski**, gynaecology oncologist (Poland); **Reita Nyberg**, gynaecology oncologist (Finland); **Yemi Ogunleye**, plastic surgeon (United States of America); **Felipe Ojeda**, gynaecology oncologist (Spain); **Alexander Olawaiye**, gynaecology oncologist (United States of America); **Jaume Ordi**, pathologist (Spain); **Gitte Ørtoft**, gynaecology oncologist (Denmark); **Pablo Padilla Iserte**, gynaecology oncologist (Spain); **Maja Pakiž**, gynaecologist (Slovenia); **Andrea Papadia**, gynaecology oncologist (Switzerland); **Guillaume Parpex**, gynaecology oncologist (France); **Fedro Alexandro Peccatori**, medical oncologist (Italy); **Shira Peleg Hasson**, medical oncologist (Israel); **Anna Myriam Perrone**, gynaecology oncologist (Italy); **Elisabetta Perrucci**, radiation oncologist (Italy); **Suzana Pessini**, gynaecology oncologist (Brazil); **Stamatios Petousis**, gynaecology oncologist (Greece); **Maria Cristina Petrella**, medical oncologist (Italy); **Primoz Petric**, radiation oncologist (Switzerland); **Jurgen M.J Piek**, gynaecology oncologist (Netherlands); **Mario Preti**, gynaecologist (Italy); **Denis Querleu**, gynaecology oncologist (France); **Bhavana Rai**, radiation oncologist (India); **Emilie Raimond**, gynaecology oncologist (France); **Thomas Samuel Ram**, radiation oncologist (India); **Rajeev Ramanah**, gynaecology oncologist (France); **Nicholas Reed**, clinical oncologist (United Kingdom); **Sophie Renard**, radiation oncologist (France); **Anupam Rishi**, radiation oncologist (United States of America); **Stefania Rizzo**, radiologist (Switzerland); **Isabel Rodriguez Rodriguez**, radiation oncologist (Spain); **Linda Rogers**, gynaecology oncologist (South Africa); **Angeles Roviro**, radiation oncologist (Spain); **Vittoria Rufini**, nuclear medicine physician (Italy); **Azmar Sadozye**, clinical oncologist (United Kingdom); **Rosa Salcedo**, gynaecology oncologist (Mexico); **Luisa Sánchez Lorenzo**, medical oncologist (Spain); **Javier Santiago Garcia**, gynaecology oncologist (Spain); **Xavier Sastre-Garau**, pathologist (France); **Giovanni Scambia**, gynaecology oncologist (Italy); **Maximilian Schmid**, radiation oncologist (Austria); **Tine Henrichsen Schnack**, gynaecology oncologist (Denmark); **Stefan Schönberger**, pediatric oncologist (Germany); **Jalid Sehouli**, gynaecology oncologist (Germany); **Cristiana Sessa**, gynaecology oncologist (Switzerland); **Franziska Siegenthaler**, gynaecologist (Switzerland); **Johann Silke**, gynaecology oncologist (Switzerland); **Tayup Simsek**, gynaecology oncologist (Turkey); **Piero Sismondi**, obstetrician gynaecologist (Italy); **Erik Skof**, medical oncologist (Slovenia); **Alejandro Soderini**, gynaecology oncologist (Brazil); **Anane Abrous Soumya**, radiation oncologist (France); **Sofia Spampinato**, medical physicist (Denmark); **Artem Stepanyan**, gynaecology oncologist (Armenia); **Simona Stolnicu**, pathologist (Romania); **Eva-Maria Strömsholm**, patient (Finland); **Sudha Sundar**, gynaecology oncologist (United Kingdom); **John Syrios**, medical oncologist (Greece); **Luca Tagliaferri**, radiation oncologist (Italy); **Karl Tamussino**, gynaecology oncologist (Austria); **Ai Ling Tan**, gynaecology oncologist (New Zealand); **Beate Timmermann**, radiation oncologist (Germany); **Anastasios Tranoulis**, gynaecology oncologist (United Kingdom); **Irina Tripac**, gynaecology oncologist (Moldova); **Elisa Tripodi**, gynaecologist (Italy); **Dimitrios Tsolakidis**, gynaecologist (Greece); **Arno Uppin**, gynaecology oncologist (Estonia); **Margit Valgma**, radiation oncologist (Estonia); **Jacobus van der Velden**, gynaecology oncologist (Netherlands); **Lena van Doorn**, gynaecology oncologist (Netherlands); **Marion P.R van**

**Gellekom**, medical physicist (Netherlands); **Emma Verastegui**, palliative care physician (Mexico); **René Verheijen**, gynaecology oncologist (France); **Lisa Vicenzi**, radiation oncologist (Italy); **Pedro Vieira-Baptista**, gynaecologist (Portugal); **Elena Villafranca**, radiation oncologist (Spain); **Khadija Mohamed Warfa**, gynaecology oncologist (Kenya); **Anneke Westermann**, medical oncologist (Netherlands); **Pauline Wimberger**, gynaecology oncologist (Germany); **Catheryn Yashar**, radiation oncologist (United States of America).
